# Supplementary material
Source: PubMed Central journal article supplement (PMC1478203)
Supplement: 7601120s1.pdf [file 7601120s1.pdf]

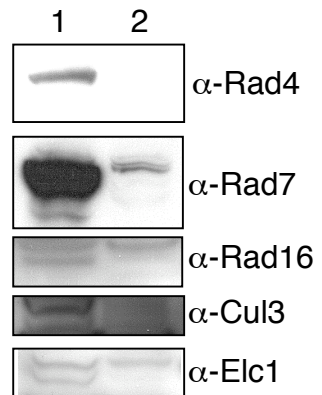

Figure S1: Specificity of antibodies used in this study. Western blot using antibodies indicated on right. Lane1 WT extract Lane 2 Extract from the corresponding deletion strain.
