# Supplementary material
Source: PubMed Central journal article supplement (PMC1478203)
Supplement: 7601120s2.pdf [file 7601120s2.pdf]

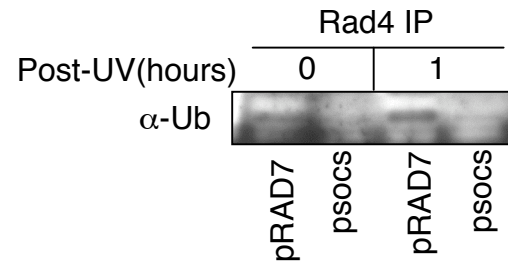

Figure S2: Mutation in Rad7 SOCS box domain blocks Rad4 ubiquitination *in vivo*. Western blot probed with anti-ubiquitin antibody. Samples were immunoprecipitated with Rad4 antibody from extracts made immediately after (0) or 1 hour after (1) exposure to UV.
