# Supplementary material
Source: PubMed Central journal article supplement (PMC1478203)
Supplement: 7601120s3.pdf [file 7601120s3.pdf]

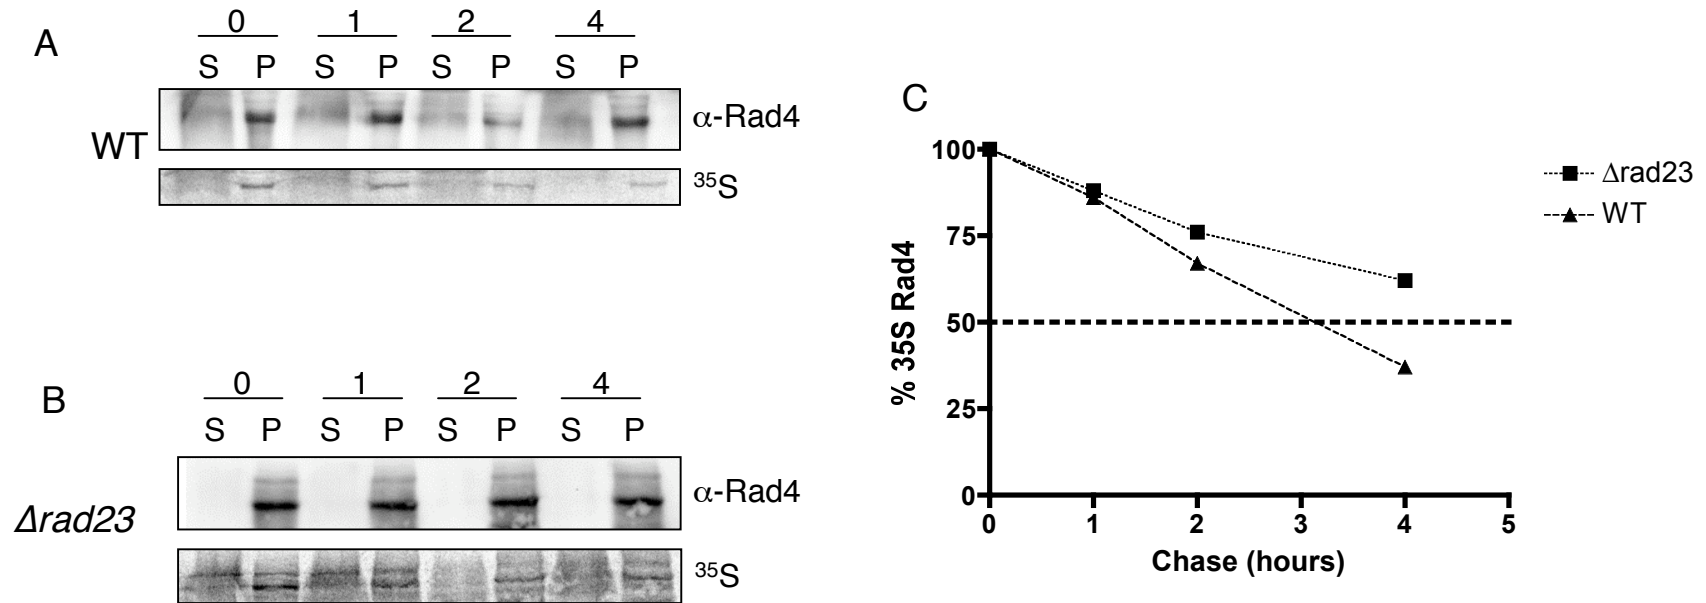

Figure S3: Rad4 stability is not altered in a  $\Delta rad23$  strain. Pulse chase treatment with  $^{35}\text{S}$  labeled methionine followed by immunoprecipitation with anti-Rad4 antibody. ( S-supernatant P-Pellet ) A) WT B)  $\Delta rad23$  (Reduced levels of Rad4 in the  $\Delta rad23$  strain accounts for the higher background in the  $^{35}\text{S}$  exposure) C) Quantitation of data from A and B (normalized against Rad4 levels)
