# Supplementary material
Source: PubMed Central journal article supplement (PMC1478203)

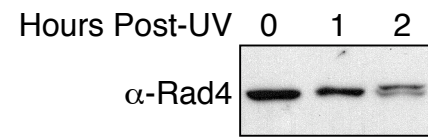

Figure S4: Western blot of a 5-15% gradient SDS PAGE gel

Supplement: 7601120s4.pdf [file 7601120s4.pdf]
